# Supplementary figures and images for: A novel FXYD5 / MTDH axis regulates the progression and immune response of ovarian cancer
Source: Research Square preprint supplement (doi:10.21203/rs.3.rs-7116373/v1), 2025-10-22

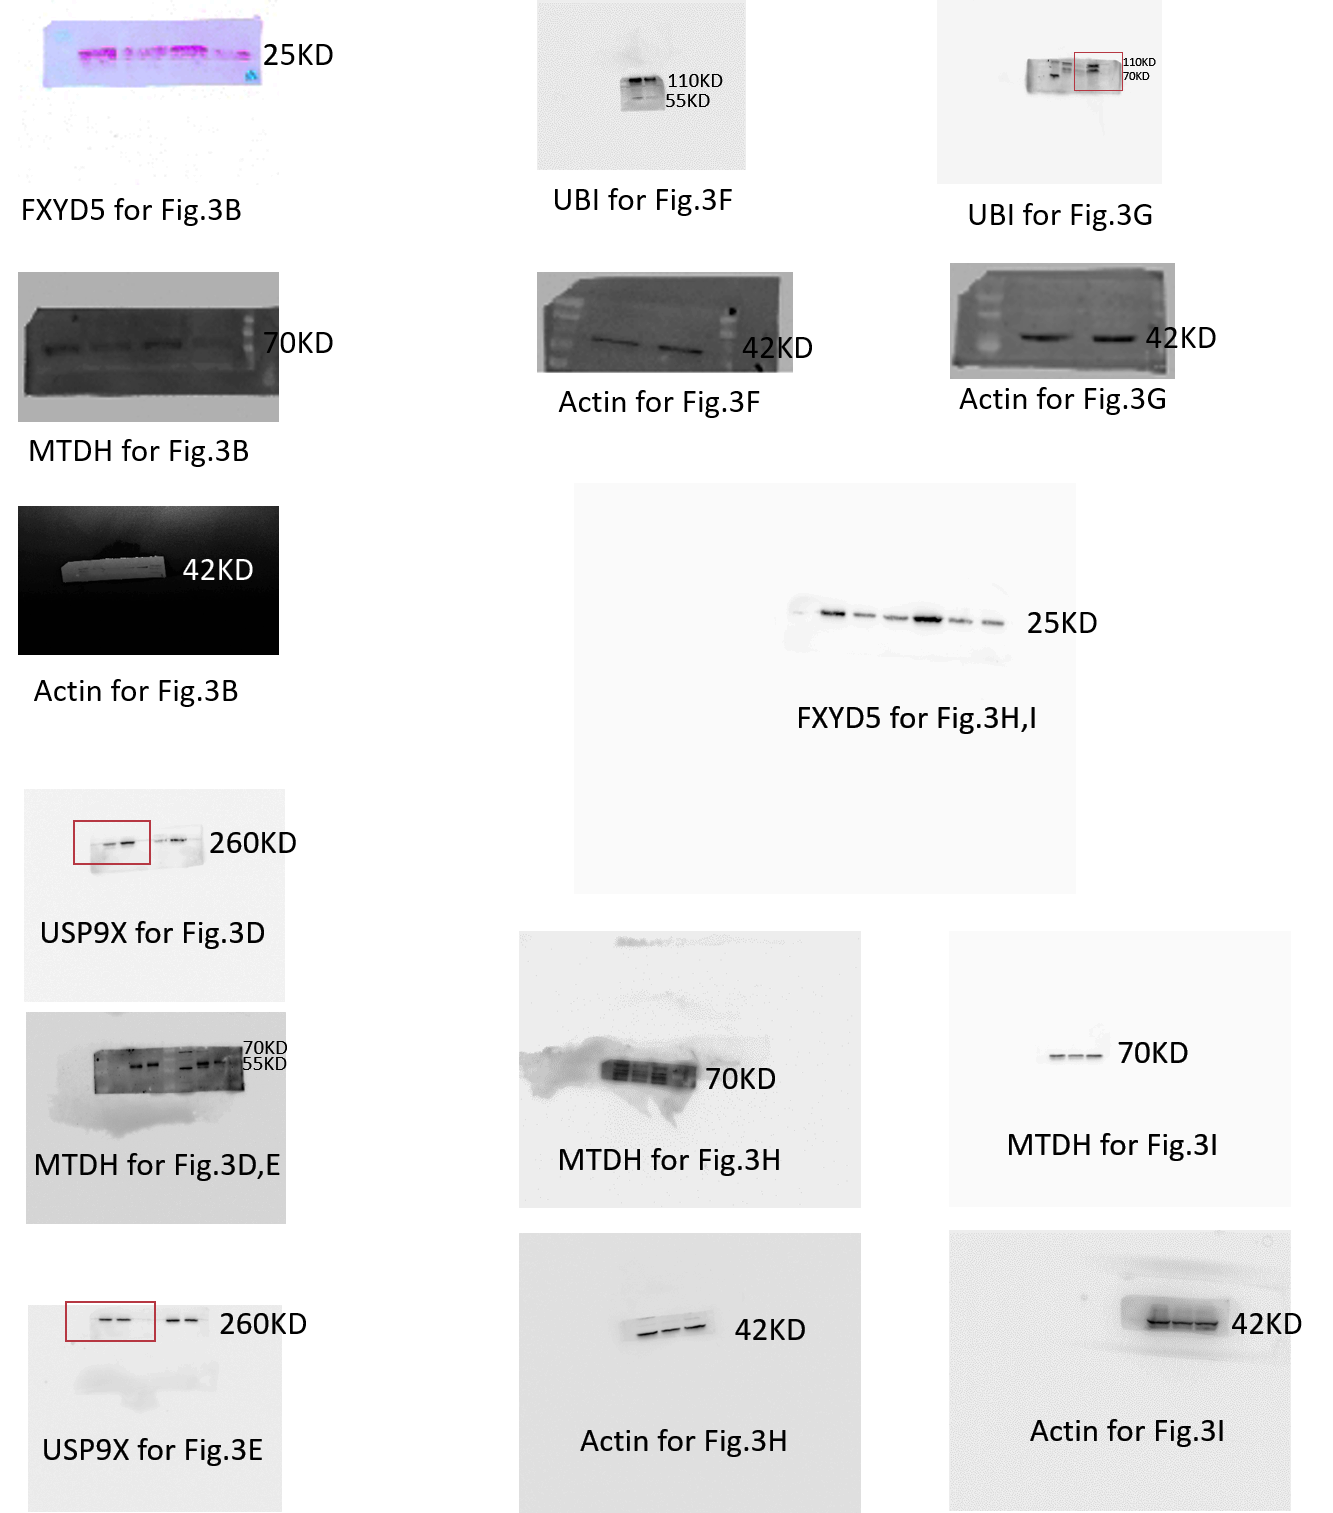


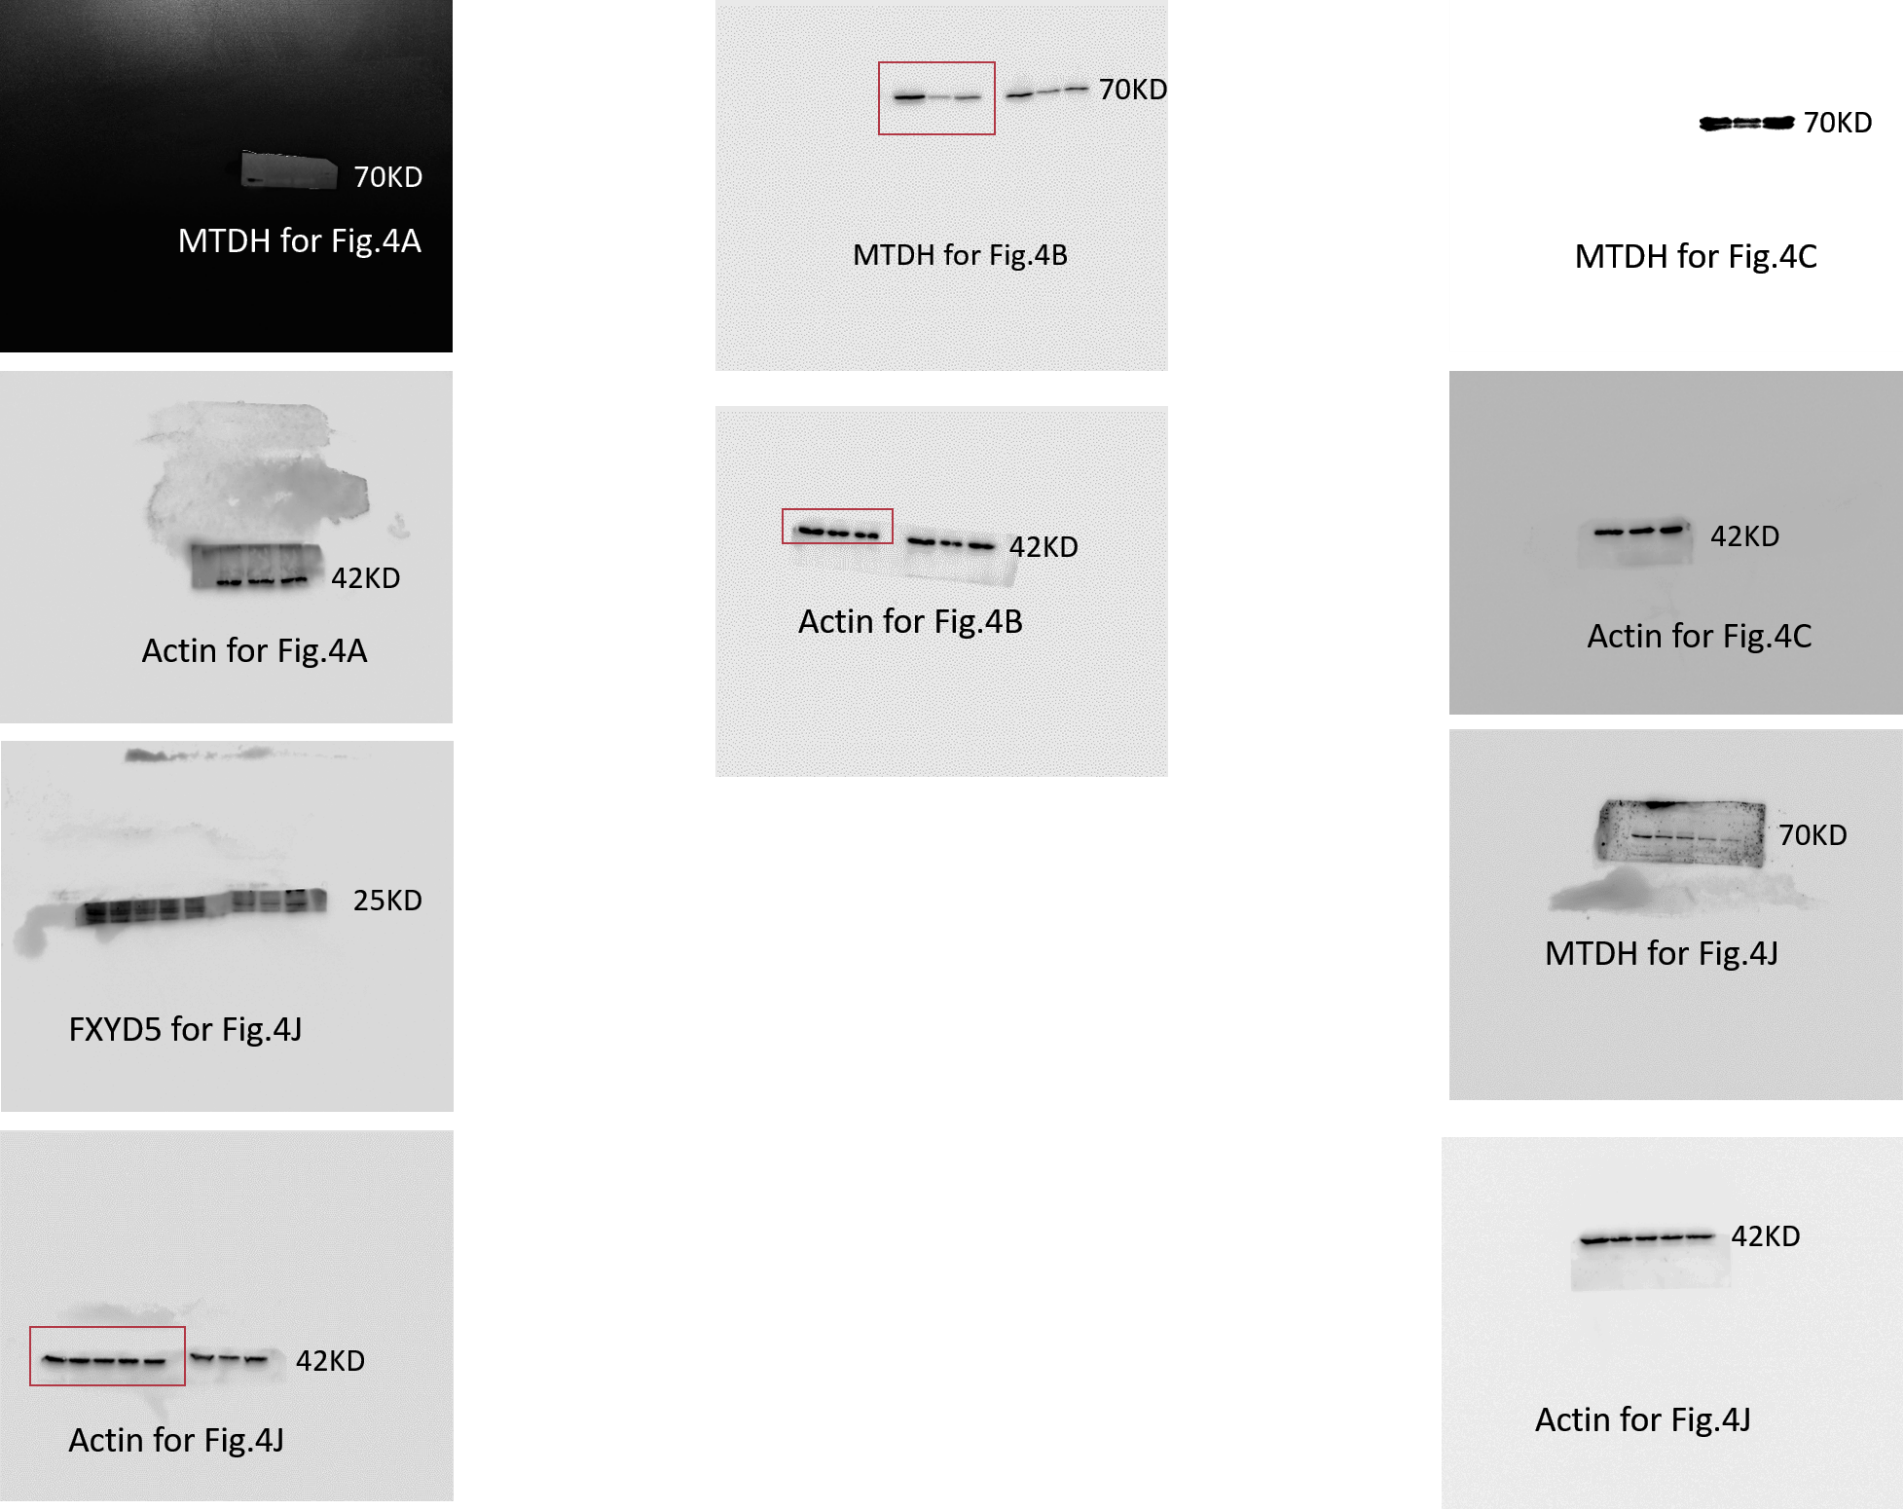


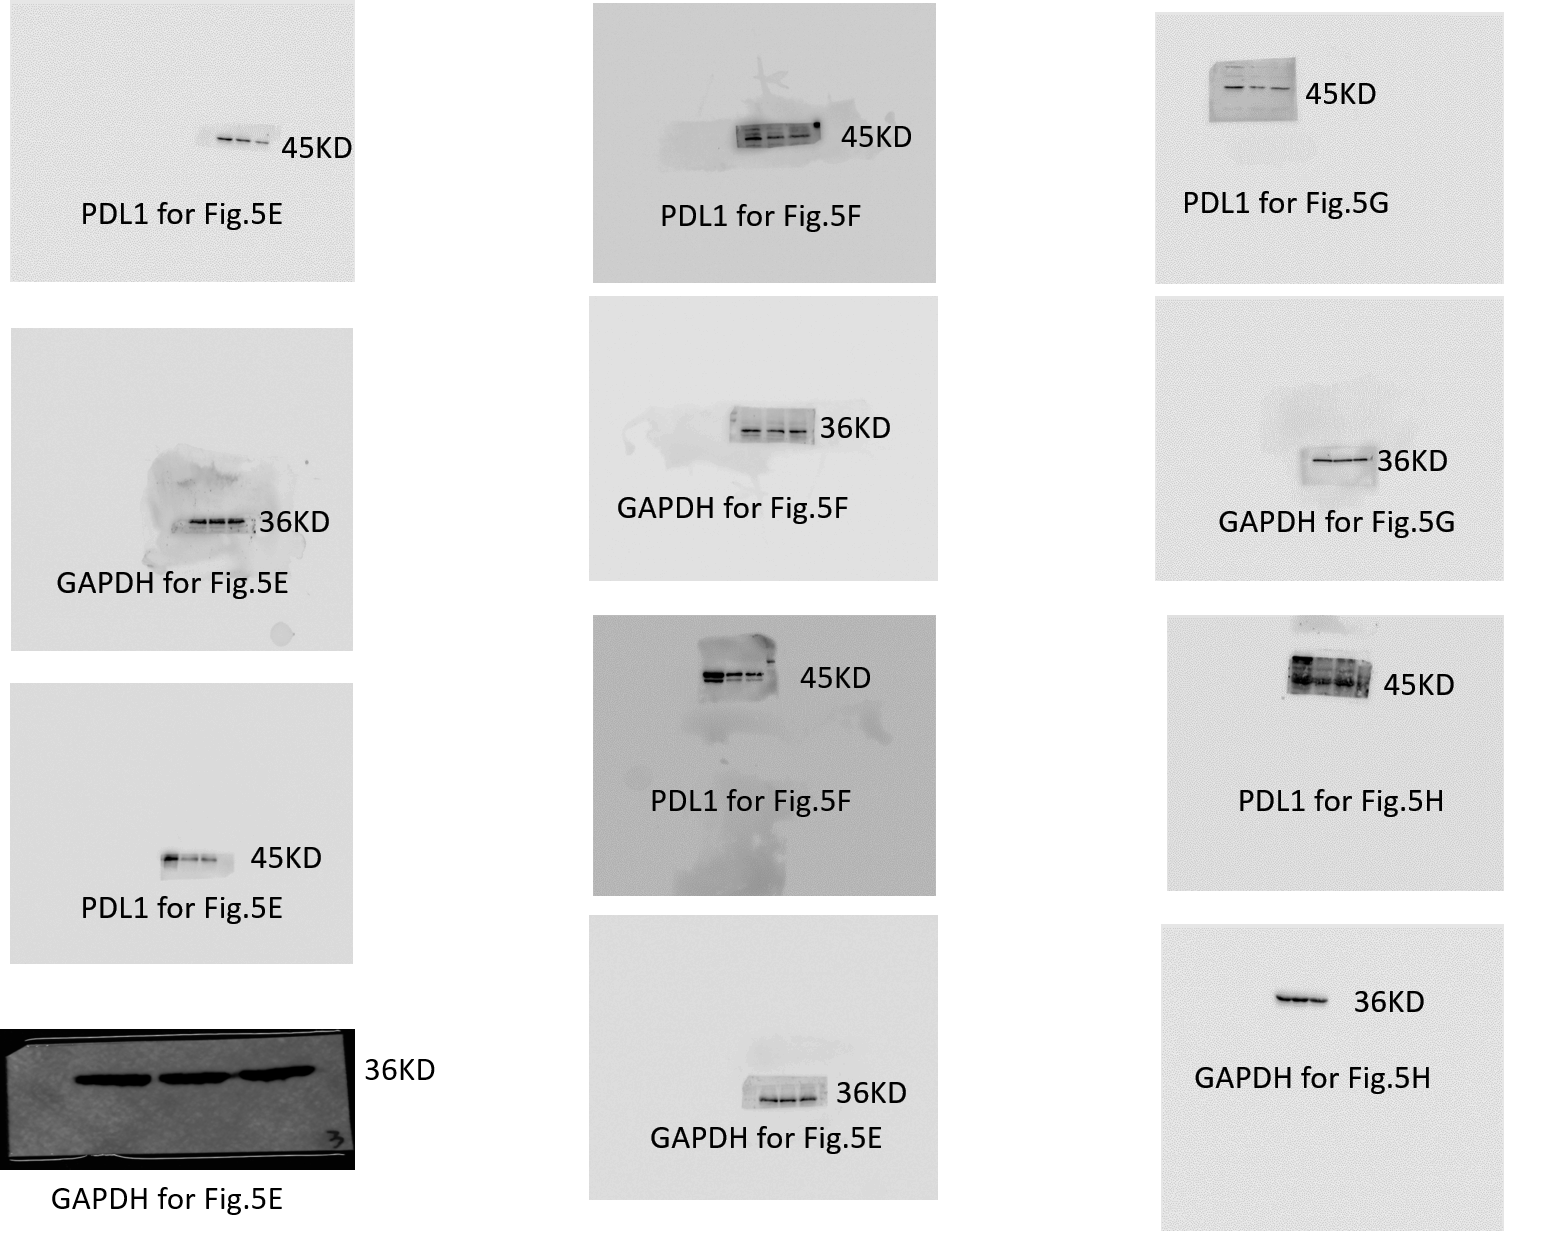

Supplement: Supplementary file 1 [file 24f4cb5be1e1fb4effb34907.docx]
